# Supplementary material
Source: HighWire-hosted journal article supplement (https://bmjopen.bmj.com/content/12/5/e055869)
Supplement: inline-supplementary-material-1 [file inline-supplementary-material-1.pdf]

**Table 1 bis. Calculation of the sample size**

Findings of the PneumO-LD-CT cohort (unpublished results). For each of the 200 participants, the probability of pneumonia was assessed by a clinician before and after LDCT. A committee of experts adjudicated the diagnosis of pneumonia.

| <i>Clinician's estimates of the probability of pneumonia based on CXR (before LDCT)</i> | <i>Clinician's estimates of the probability of pneumonia after LDCT</i> |                    |            |
|-----------------------------------------------------------------------------------------|-------------------------------------------------------------------------|--------------------|------------|
| <b>Patients with pneumonia according to an adjudication committee (n=131)</b>           |                                                                         |                    |            |
|                                                                                         | Low                                                                     | Intermediate/ high | TOTAL      |
| Low                                                                                     | <b>1</b>                                                                | <b>6</b>           | <b>7</b>   |
| Intermediate/ high                                                                      | <b>10</b>                                                               | <b>116</b>         | <b>126</b> |
| TOTAL                                                                                   | <b>11</b>                                                               | <b>122</b>         | <b>133</b> |
| <b>Patients without pneumonia according to an adjudication committee (n=67)</b>         |                                                                         |                    |            |
|                                                                                         | Low                                                                     | Intermediate/ high | TOTAL      |
| Low                                                                                     | <b>9</b>                                                                | <b>1</b>           | <b>10</b>  |
| Intermediate/ high                                                                      | <b>37</b>                                                               | <b>20</b>          | <b>57</b>  |
| TOTAL                                                                                   | <b>46</b>                                                               | <b>21</b>          | <b>67</b>  |
| <b>Total patients (n=200)</b>                                                           |                                                                         |                    |            |

In this adjudication, the panel of experts had access to the results of LDCT to rate their probability of pneumonia, on the contrary of previous published results <sup>23</sup>.

The accuracy of clinician's diagnosis before LDCT was  $(126+10)/(133+67) = 0.68$ .

The accuracy of clinician's diagnosis after LDCT was  $(122+46)/(133+67) = 0.84$ .
